# Supplementary material for: An on-site and portable electrochemical sensing platform based on spinel zinc ferrite nanoparticles for the quality control of paracetamol in pharmaceutical samples
Source: Royal Society of Chemistry journal article supplement (doi:10.1039/d3na00749a), 2023-11-16
Supplement: d3na00749a1.pdf [file d3na00749a1.pdf]

Supporting information for

**An on-site and portable electrochemical sensing platform based on  
spinel zinc ferrite nanoparticles for the quality control of paracetamol in  
pharmaceutical samples**

Nguyen Tuan Anh<sup>+1,\*</sup>, Le Minh Tung<sup>+3,\*\*</sup>, Le Khanh Vinh<sup>4</sup>, Nguyen Van Quy<sup>5</sup>,

Ong Van Hoang<sup>1,6</sup>, Ngo Xuan Dinh<sup>1</sup>, Anh-Tuan Le<sup>1,2,\*\*\*</sup>

(1) Phenikaa University Nano Institute (PHENA), PHENIKAA University, Hanoi 12116, Vietnam

(2) Faculty of Materials Science and Engineering, PHENIKAA University, Hanoi 12116, Vietnam

(3) Department of Physics, Tien Giang University, My Tho city, Tien Giang Province, Vietnam

(4) National Institute of Applied Mechanics and Informatics, Vietnam Academy of Science and  
Technology (VAST), Ho Chi Minh 70000, Vietnam

(5) International Training Institute for Materials Science (ITIMS), Hanoi University of Science  
and Technology (HUST), 01 Dai Co Viet Road, Hanoi 10000, Vietnam

(6) University of Transport Technology, Trieu Khuc, Thanh Xuan District, Hanoi, Viet Nam

Corresponding authors:

\*[anh.nguyentuan1@phenikaa-uni.edu.vn](mailto:anh.nguyentuan1@phenikaa-uni.edu.vn) (N.T. Anh)

\*\*[leminhtung@tgu.edu.vn](mailto:leminhtung@tgu.edu.vn) (M.T. Le)

\*\*\*[tuan.leanh@phenikaa-uni.edu.vn](mailto:tuan.leanh@phenikaa-uni.edu.vn) (A.-T. Le)

<sup>+</sup> N.T. Anh and L.M Tung contributed equally to this work



**Fig. S1.** CV responses of the bare SPE and ZnFe<sub>2</sub>O<sub>4</sub>/SPE in 5 mM [Fe(CN)<sub>6</sub>]<sup>3-/4-</sup> containing 0.1 M KCl at different scan rates from 10 to 70 mV s<sup>-1</sup> (a and c) and the corresponding calibration plots of peak current response vs. square root of scan rate (b and d), respectively.



**Fig. S2.** Experimental and fitted Nyquist plots of the bare SPE (a) and ZnFe<sub>2</sub>O<sub>4</sub>/SPE (b) in the frequency range from 0.01 kHz to 00 kHz. Inset shows the Randles equivalent circuit used for fitting the data.



**Fig. S3.** Chronoamperometric response and plot of  $I_C/I_L$  vs.  $t^{1/2}$  acquired from the chronoamperograms of the bare SPE (a and b) and ZnFe<sub>2</sub>O<sub>4</sub>/SPE (c and d) in the absence and presence of 500 μM PCM in 0.1 M PBS (pH 5.0).



**Fig. S4.** Effect of accumulation time (a,b) and modified amount (c,d) on the PCM oxidation peak current of the ZnFe<sub>2</sub>O<sub>4</sub>/SPE.



**Fig. S5.** Repeatability of the ZnFe<sub>2</sub>O<sub>4</sub>/SPE in 250  $\mu\text{M}$  PCM.



**Fig. S6.** Interference investigation of the ZnFe<sub>2</sub>O<sub>4</sub>/SPE in 0.1 M PBS (pH 5.0) containing 250 μM PCM with 10-fold concentration of interference substances.

**Table S1** Comparative study of the performance of various modified electrodes for PCM electrochemical detection <sup>a</sup>

| Modified Electrodes                            | Techniques  | Analytical ranges ( $\mu\text{M}$ ) | Limit of detection ( $\mu\text{M}$ ) | Ref.      |
|------------------------------------------------|-------------|-------------------------------------|--------------------------------------|-----------|
| C60/GCE                                        | DPV         | 50 – 1500                           | 5                                    | 1         |
| Cobalt hydroxide NPs/GCE                       | Amperometry | 50 – 550                            | 1.83                                 | 2         |
| Fe <sub>2</sub> O <sub>3</sub> /CPE            | DPV         | 2 – 150                             | 1.16                                 | 3         |
| ZrO <sub>2</sub> /CPE                          | CV          | 10 – 60                             | 0.68                                 | 4         |
| CDA/Au-Ag/GCE                                  | Amperometry | 10 – 100                            | 2.6                                  | 5         |
| PAY/nano TiO <sub>2</sub> /GCE                 | DPV         | 12 - 120                            | 2.0                                  | 6         |
| AuNP-PGA/SWCNTs                                | DPV         | 8.3 – 145.6                         | 1.18                                 | 7         |
| Ni-Al-HCF                                      | Amperometry | 3 – 1500                            | 0.8                                  | 8         |
| TiO <sub>2</sub> /Graphene/GCE                 | DPV         | 1 – 100                             | 0.21                                 | 9         |
| ZnFe <sub>2</sub> O <sub>4</sub> nanomaterials | DPV         | 0.5 – 400                           | 0.29                                 | This work |

<sup>a</sup> GCE: glassy carbon electrode; CDA: cellulose diacetate; CPE: carbon paste electrode; PAY : poly(acid yellow 9); PGA: poly-glutamic acid; SWCNTs: single-walled carbon nanotubes; Ni-Al-HCF: hexacyanoferrate(III) intercalated Ni Al layered double hydroxide

**Table S2** Comparative study of the performance of various techniques for the detection of PCM <sup>b</sup>

| Techniques                     | Analytical ranges                 | Limit of detection          | Real samples           | Ref.      |
|--------------------------------|-----------------------------------|-----------------------------|------------------------|-----------|
| HPLC                           | 0.409 – 400 $\mu\text{g mL}^{-1}$ | 0.409 $\mu\text{g mL}^{-1}$ | -                      | 10        |
| RP-HPLC                        | 20 – 80 $\mu\text{g mL}^{-1}$     | 6 $\text{ng mL}^{-1}$       | Tablet                 | 11        |
| Colorimetric method            | 25 – 400 $\text{mg mL}^{-1}$      | -                           | Plasma                 | 12        |
| Chemiluminescence              | 0.025 – 0.25 $\mu\text{M}$        | 0.01 $\mu\text{M}$          | Pharmaceuticals        | 13        |
| Fluorescence                   | 0.067 – 233 $\mu\text{g L}^{-1}$  | 0.022 $\mu\text{g L}^{-1}$  | Human serum            | 14        |
| UV-spectrophotometric          | 2 – 64 $\mu\text{g mL}^{-1}$      | 0.591 $\mu\text{g mL}^{-1}$ | Tablet                 | 15        |
| Transmission FTIR spectroscopy | 0.005 – 1 $\text{mg mL}^{-1}$     | 0.005 $\text{mg mL}^{-1}$   | Tablets and capsules   | 16        |
| FI – CE                        | 6.2 – 200 $\mu\text{g mL}^{-1}$   | 0.7 $\mu\text{g mL}^{-1}$   | Tablet                 | 17        |
| Electrochemical sensor         | 0.5 – 400 $\mu\text{M}$           | 0.29 $\mu\text{M}$          | Tablet and human urine | This work |

<sup>b</sup> HPLC: High-performance liquid chromatography; RP-HPLC: Reverse phase High-performance liquid chromatography; FTIR: Fourier transform infrared; FI – CE: flow injection-capillary electrophoresis.



## References

- 1 R. N. Goyal and S. P. Singh, *Electrochim. Acta*, 2006, **51**, 3008–3012.
- 2 M. Houshmand, A. Jabbari, H. Heli, M. Hajjizadeh and A. A. Moosavi-Movahedi, *J. Solid State Electrochem.*, 2008, **12**, 1117–1128.
- 3 M. M. Vinay and Y. A. Nayaka, *J. Sci. Adv. Mater. Devices*, 2019, **4**, 442–450.
- 4 S. B. Matt, S. Raghavendra, M. Shivanna, M. Sidlinganahalli and D. M. Siddalingappa, *J. Inorg. Organomet. Polym. Mater.*, 2021, **31**, 511–519.
- 5 R. Wei, *Int. J. Electrochem. Sci.*, 2017, **12**, 9131–9140.
- 6 S. A. Kumar, C.-F. Tang and S.-M. Chen, *Talanta*, 2008, **76**, 997–1005.
- 7 M.-P. N. Bui, C. A. Li, K. N. Han, X.-H. Pham and G. H. Seong, *Sensors Actuators B Chem.*, 2012, **174**, 318–324.
- 8 K. Asadpour-Zeynali and R. Amini, *Electroanalysis*, 2017, **29**, 635–642.
- 9 Y. Fan, J.-H. Liu, H.-T. Lu and Q. Zhang, *Colloids Surfaces B Biointerfaces*, 2011, **85**, 289–292.
- 10 M. L. Altun, *Turkish J. Chem.*, 2002, **26**, 521–528.
- 11 P. R. Battu and M. S. Reddy, *Asian J. Res. Chem.*, 2009, **2**, 70–72.
- 12 F. Shihana, D. Dissanayake, P. Dargan and A. Dawson, *Clin. Toxicol.*, 2010, **48**, 42–46.
- 13 D. Easwaramoorthy, Y.-C. Yu and H.-J. Huang, *Anal. Chim. Acta*, 2001, **439**, 95–100.
- 14 X. Liu, W. Na, H. Liu and X. Su, *Biosens. Bioelectron.*, 2017, **98**, 222–226.

- 15 G. Murtaza, S. A. Khan, A. Shabbir, A. Mahmood, M. Asad, K. Farzana, N. S. Malik and I. Hussain, *Sci. Res. Essays*, 2011, **6**, 417–421.
- 16 M. A. Mallah, S. T. H. Sherazi, M. I. Bhangar, S. A. Mahesar and M. A. Bajeer, *Spectrochim. Acta Part A Mol. Biomol. Spectrosc.*, 2015, **141**, 64–70.
- 17 X. Liu, L. Liu, H. Chen and X. Chen, *J. Pharm. Biomed. Anal.*, 2007, **43**, 1700–1705.
